# Supplementary material
Source: PubMed Central journal article supplement (PMC3048854)
Supplement: JCI41651sd.pdf [file JCI41651sd.pdf]

**Supplementary Data (Ms JCI 41651-RG-RV-2)**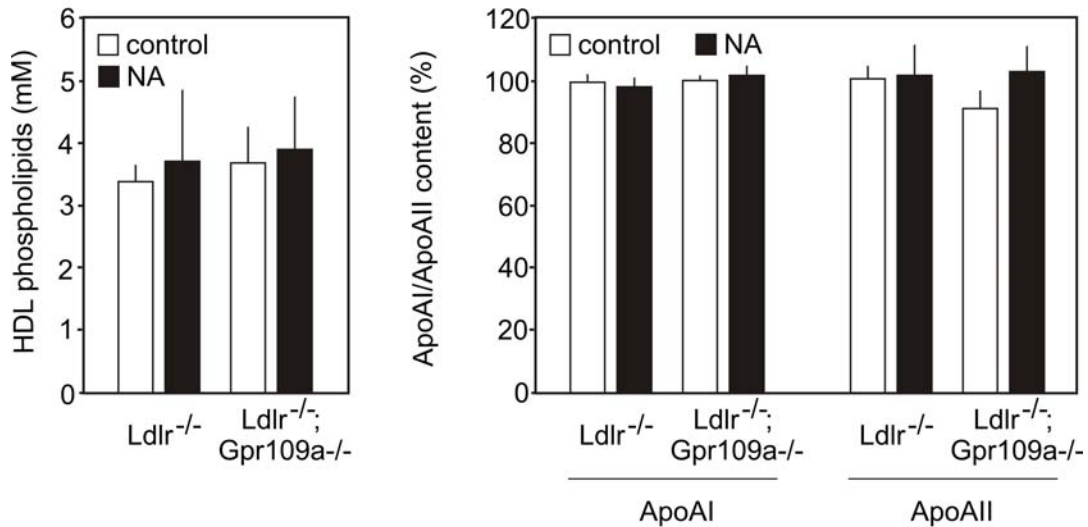

**Suppl. Fig. 1. Analysis of HDL composition.** *Ldlr*<sup>-/-</sup> or *Ldlr*<sup>-/-</sup>; *Gpr109a*<sup>-/-</sup> animals received high fat diet without or with 0.3% nicotinic acid (NA) as indicated. 8 weeks after the beginning of the high fat diet, plasma was taken, and lipoproteins were separated by FPLC. In the HDL fraction, phospholipid concentrations as well as the amounts of ApoAI and ApoAII were determined.

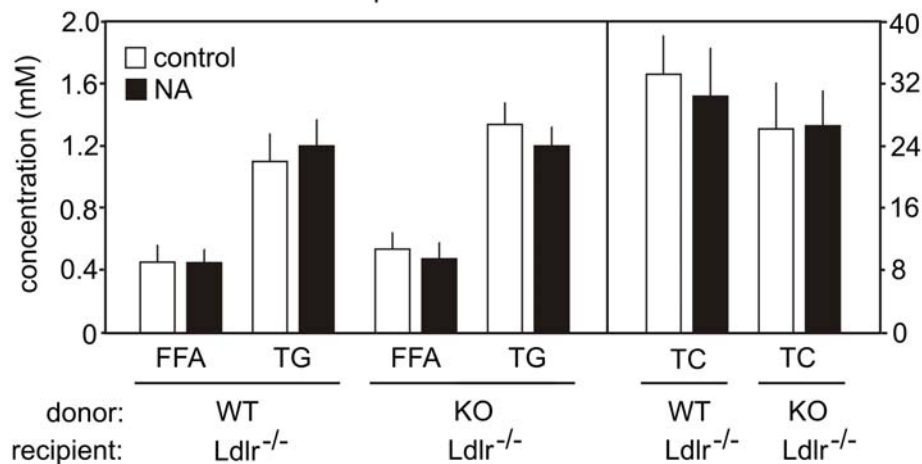

**Suppl. Fig. 2. Plasma lipid levels in untreated and nicotinic acid-treated bone marrow chimeras.** Bone marrow transplantations were performed as described, and animals received high fat diet without and with 0.3% nicotinic acid. After 16 weeks, plasma levels of free fatty acids (FFA), triglycerides (TG) and total cholesterol (TC) were determined as described. Values are mean values  $\pm$  SEM ( $n \geq 3$ ).

### Methods

To determine cholesterol and phospholipid content of HDL particles, the Apo-B containing lipoproteins were precipitated by phosphotungstate/magnesium chloride with the cholesterol-HDL precipitant from Biolabo (Maizy, France). The lipid content of the HDL fraction was determined using colorimetric enzymatic assay kits from Biolabo (Maizy, France).

For determination of ApoAI and ApoAII content, equal amounts of the HDL fraction were separated by SDS-PAGE. Gels were stained with Coomassie blue, and the ApoA-I and ApoA-II content was analyzed by densitometric measurement using ImageJ software.
